# Supplementary material
Source: ML conference proceedings conference paper supplement (https://openreview.net/forum?id=M97QPUXvxb)
Supplement: supplementary_material [file attachment]

# Robust Multi-Agent Reinforcement Learning for Autonomous Vehicle in Noisy Highway Environments Supplementary Material

**Lilan Lin**  
**Xiaotong Nie\***  
**Jian Hou**

LINLILANLLL@163.COM  
NIXIAOTONG@ZSTU.EDU.CN  
CHANGELEAP@163.COM

*School of Computer Science and Technology, Zhejiang Sci-Tech University, Zhejiang, China*

**Editors:** Vu Nguyen and Hsuan-Tien Lin

## Appendix A. Hyperparameters for Experiments

Table 1: Hyperparameter setting

| Name of the parameters  | Value   |
|-------------------------|---------|
| Total training episodes | 20000   |
| Testing interval        | 200     |
| Testing rounds          | 3       |
| Step length per round   | 100     |
| Learning rate           | 5e-4    |
| Discount factor         | 0.99    |
| Activation functions    | Softmax |
| Memory capacity         | 100     |
| Critic loss             | Huber   |
| GAE lambda              | 0.97    |
| Optimizer               | Adam    |

## Appendix B. The Configuration of CA-MAPPO

The factors influencing the effectiveness of CA-MAPPO are further explored. Both from the training results and the test results, the performance of CA-MAPPO has the most obvious advantage over the other algorithms when the noise intensity  $K$  is 5. Therefore we select the initial value of the noise intensity  $K_0 = 1, 2, 3$  and set the step size  $\Delta K$  to 0.5 and 1 respectively in the noisy environment when  $K = 5$ . Fig. 1 shows how the  $K$  and reward alter throughout the training process.

From Fig. 1, it is evident that when  $K_0 = 1$ , curriculum learning proceeds effectively, with  $K$  reaching the target value of 5 and achieving an average reward of approximately 20. As  $K_0$  increases, we observe that  $K$  fails to reach the target value during curriculum learning, accompanied by an obvious decline in the average reward. At  $K_0 = 3$ , the value

---

\* Corresponding author

of  $K$  is fixed and the average reward is below 0, curriculum learning fails. We attribute this to the excessively large  $K_0$  making the initial task too challenging. Additionally, at  $K_0 = 1$ , a  $\Delta K$  of 1 accelerates the curriculum learning process compared to a  $\Delta K$  of 0.5, yet their final average rewards are comparable. Similarly, at other values of  $K_0$ , the average rewards also exhibit similar trends.

The experimental results show that  $K_0$  is a critical factor influencing the process of curriculum-based adversarial learning. Therefore, selecting the appropriate  $K_0$  is crucial for the effectiveness of CA-MAPPO.

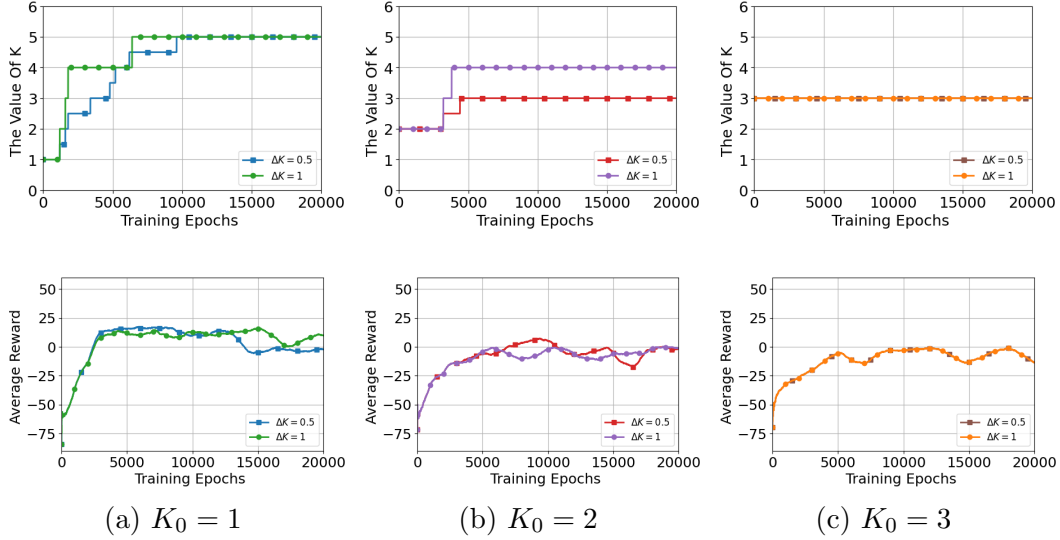

Figure 1: The influence of  $K_0$  and  $\Delta K$  on CA-MAPPO under  $K = 5$
